# Supplementary material for: Evaluation of structure–activity relationships of ginsenosides against amyloid β induced pathological behaviours in transgenic Caenorhabditis elegans
Source: Royal Society of Chemistry journal article supplement (doi:10.1039/c7ra05717b), 2017-01-01
Supplement: c7ra05717b1.pdf [file c7ra05717b1.pdf]

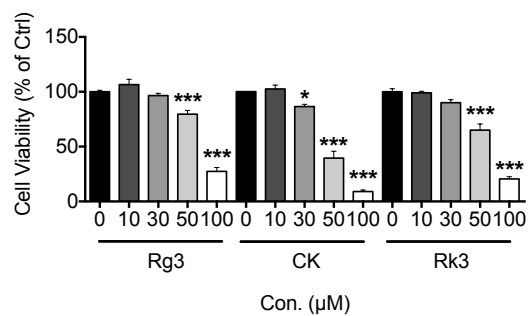

**Fig.S1** SHSY5Ysw were treated with Rg3, CK or Rk3 at different concentration for 24 h followed by measurement of cell viability through MTT assay. Error Bars represent the standard error. \*  $p < 0.05$ , \*\*\*  $p < 0.001$  compared with vehicle treated group.
